# Supplementary material
Source: publisher figshare collection journal article supplement (https://acs.figshare.com/ndownloader/files/3862015)
Supplement: Supplementary file 1 [file 3862015]

**Supporting Information for:**

# Chiral Asymmetry in the Multiphoton Ionization of Methyloxirane using Femtosecond Electron-Ion Coincidence Imaging

---

*Mohammad M. Rafiee Fanood<sup>†</sup>, Ivan Powis<sup>\*‡</sup>, Maurice H. M. Janssen<sup>†</sup>*

<sup>†</sup>LaserLaB Amsterdam, VU University Amsterdam, De Boelelaan 1081, 1081 HV Amsterdam, The Netherlands.

<sup>‡</sup>School of Chemistry, University of Nottingham, Nottingham NG7 2RD, UK

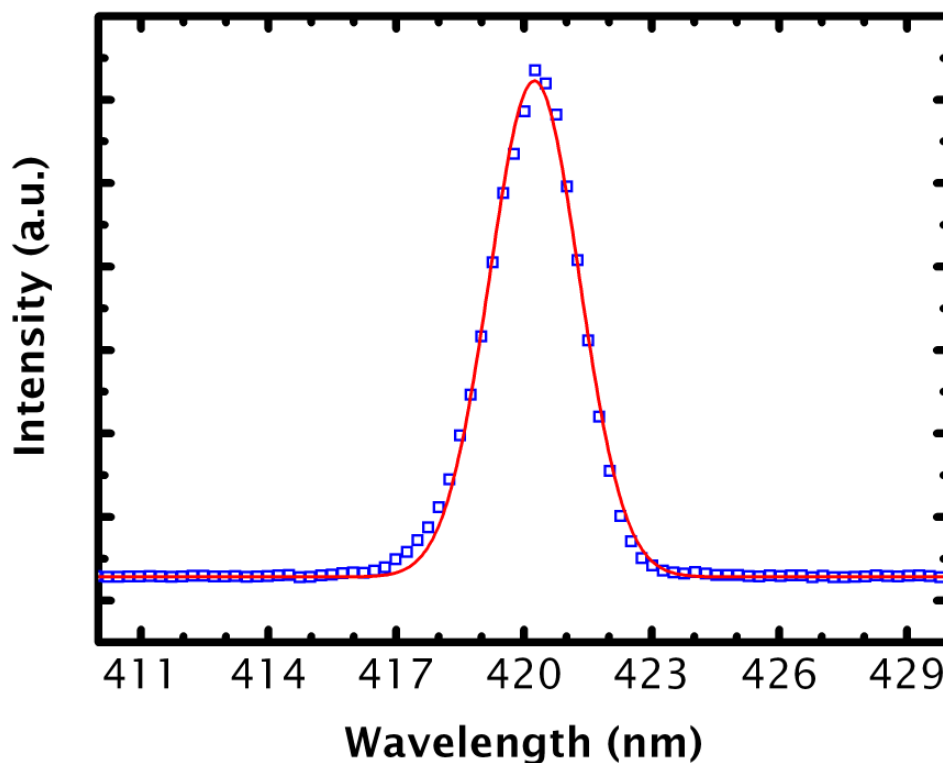

**Fig. S1** The typical spectrum of frequency doubled femtosecond laser pulse centered at 420.2 nm. From the Gaussian fit we obtain FWHM = 2.6 nm.

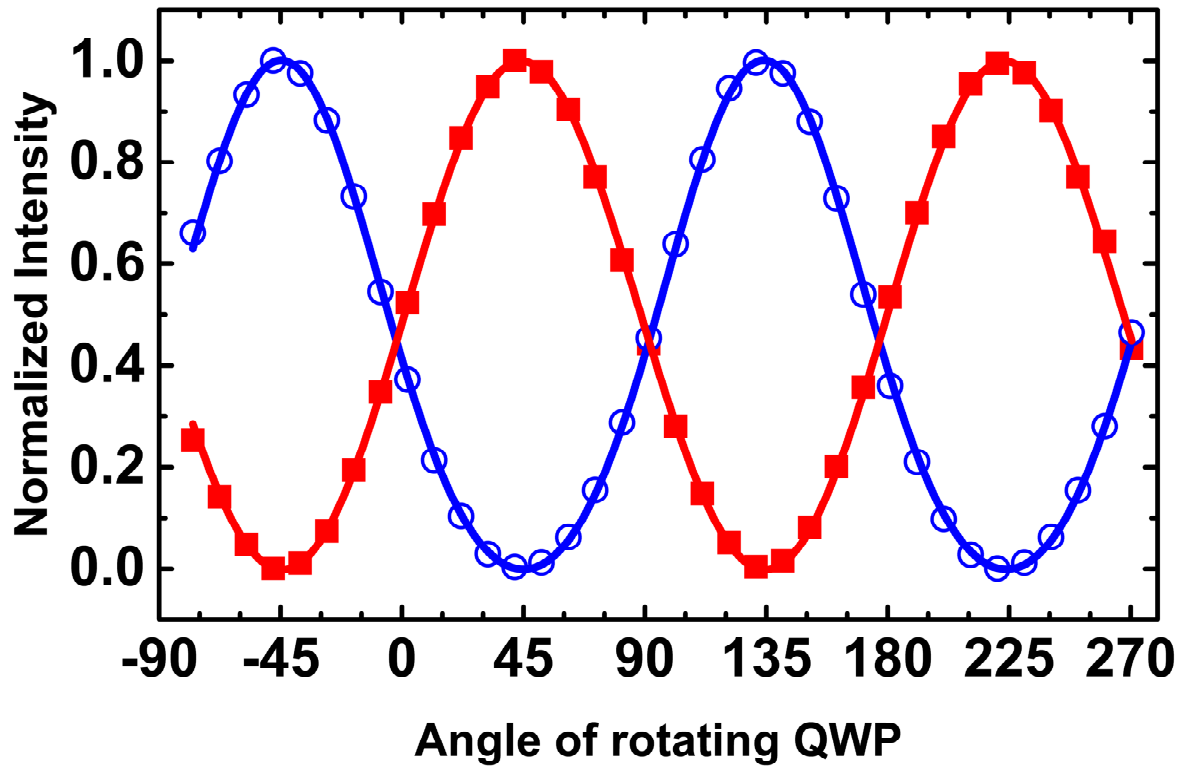

**Fig. S2** the measured graph for the analysis of the Stokes parameters of the circularly polarized laser pulses near 420 nm using the rotating quarter wave plate method. The blue curve (data points are open circle, best fit is line) was measured for LCP, the red curve (data points are filled square, best fit is line) for RCP.
